# Supplementary material for: Parallel‐Meta Suite: Interactive and rapid microbiome data analysis on multiple platforms
Source: PubMed Central journal article supplement (PMC10989749; doi:10.1002/imt2.1), 2022-03-06

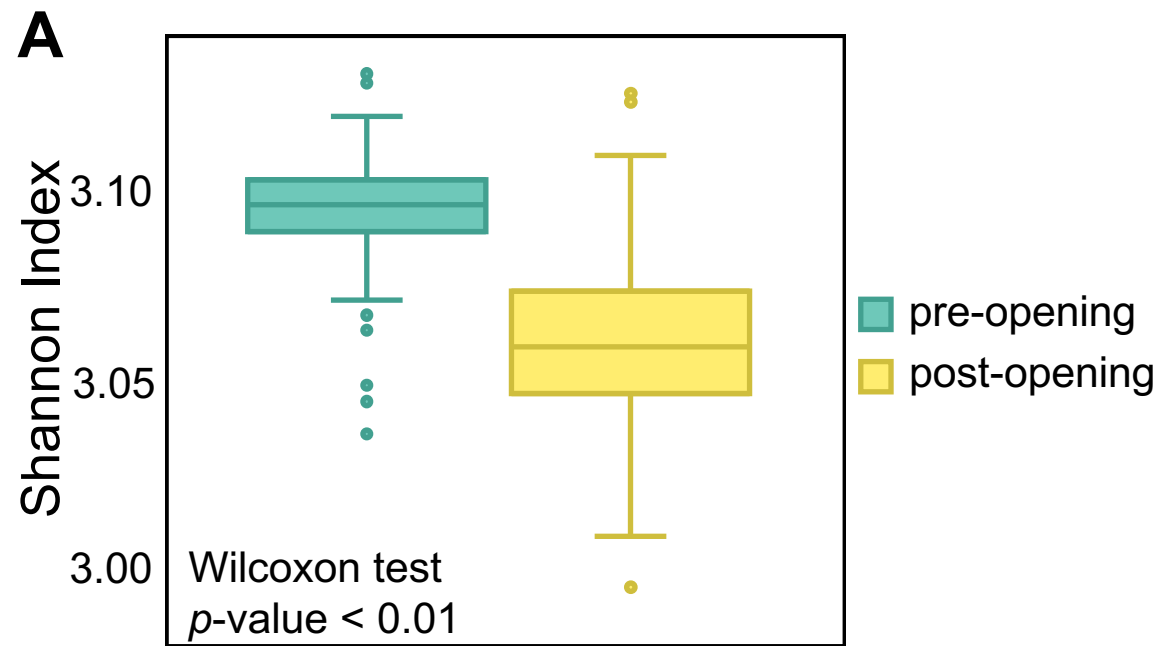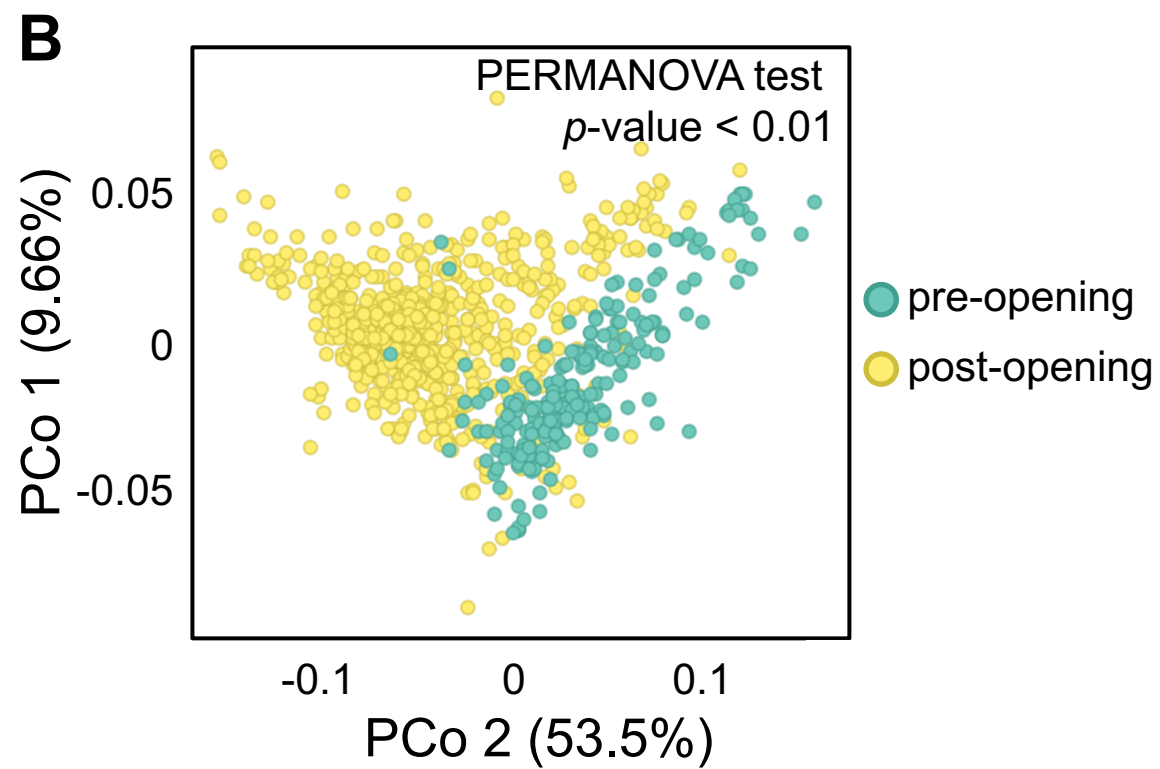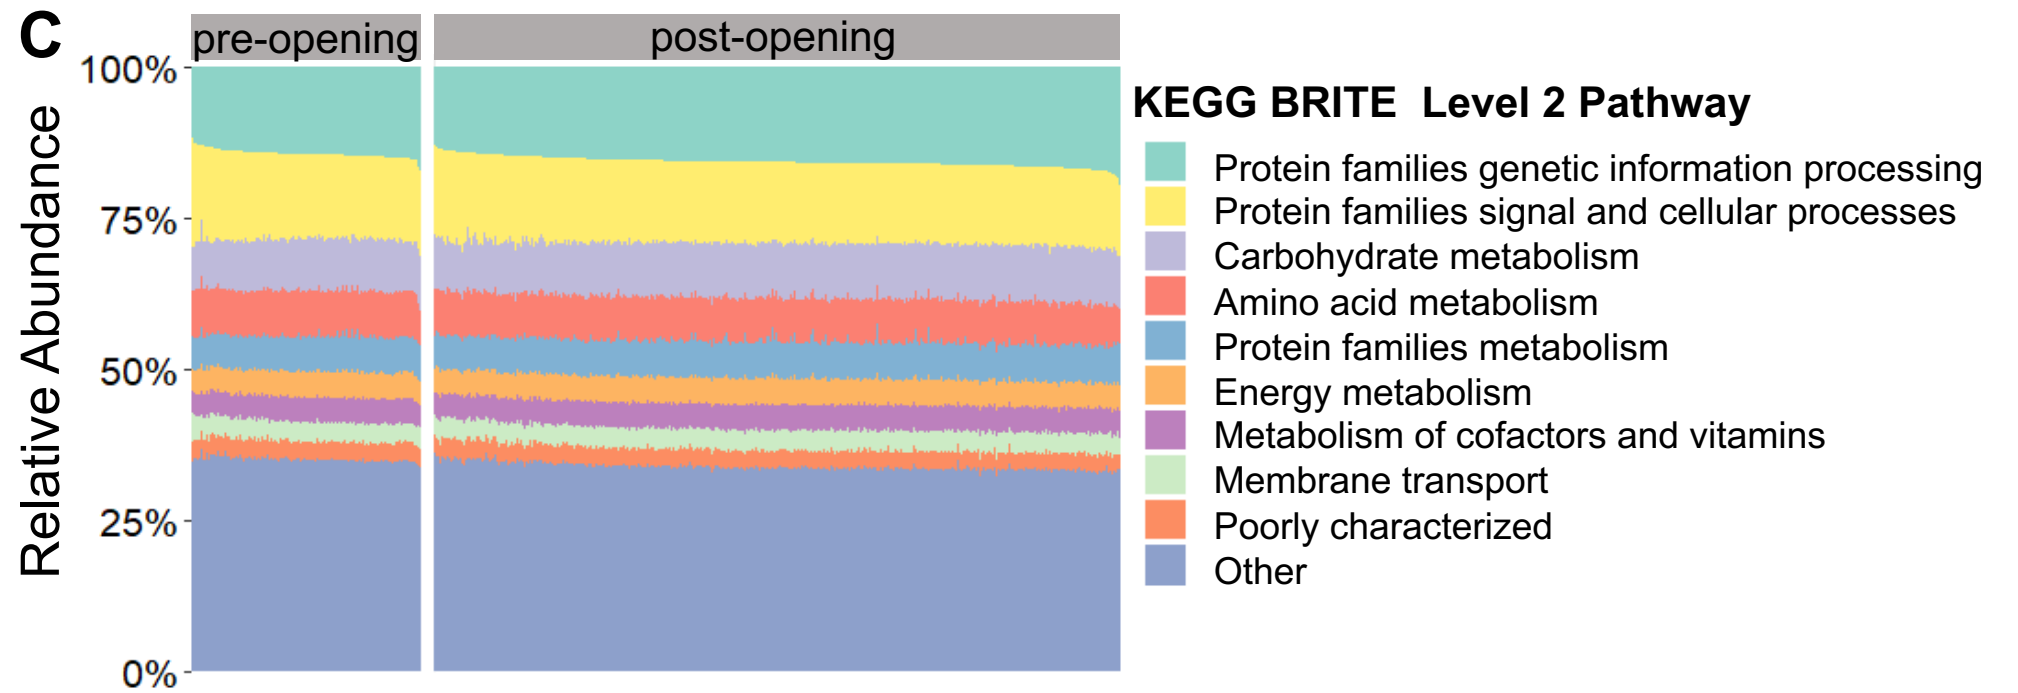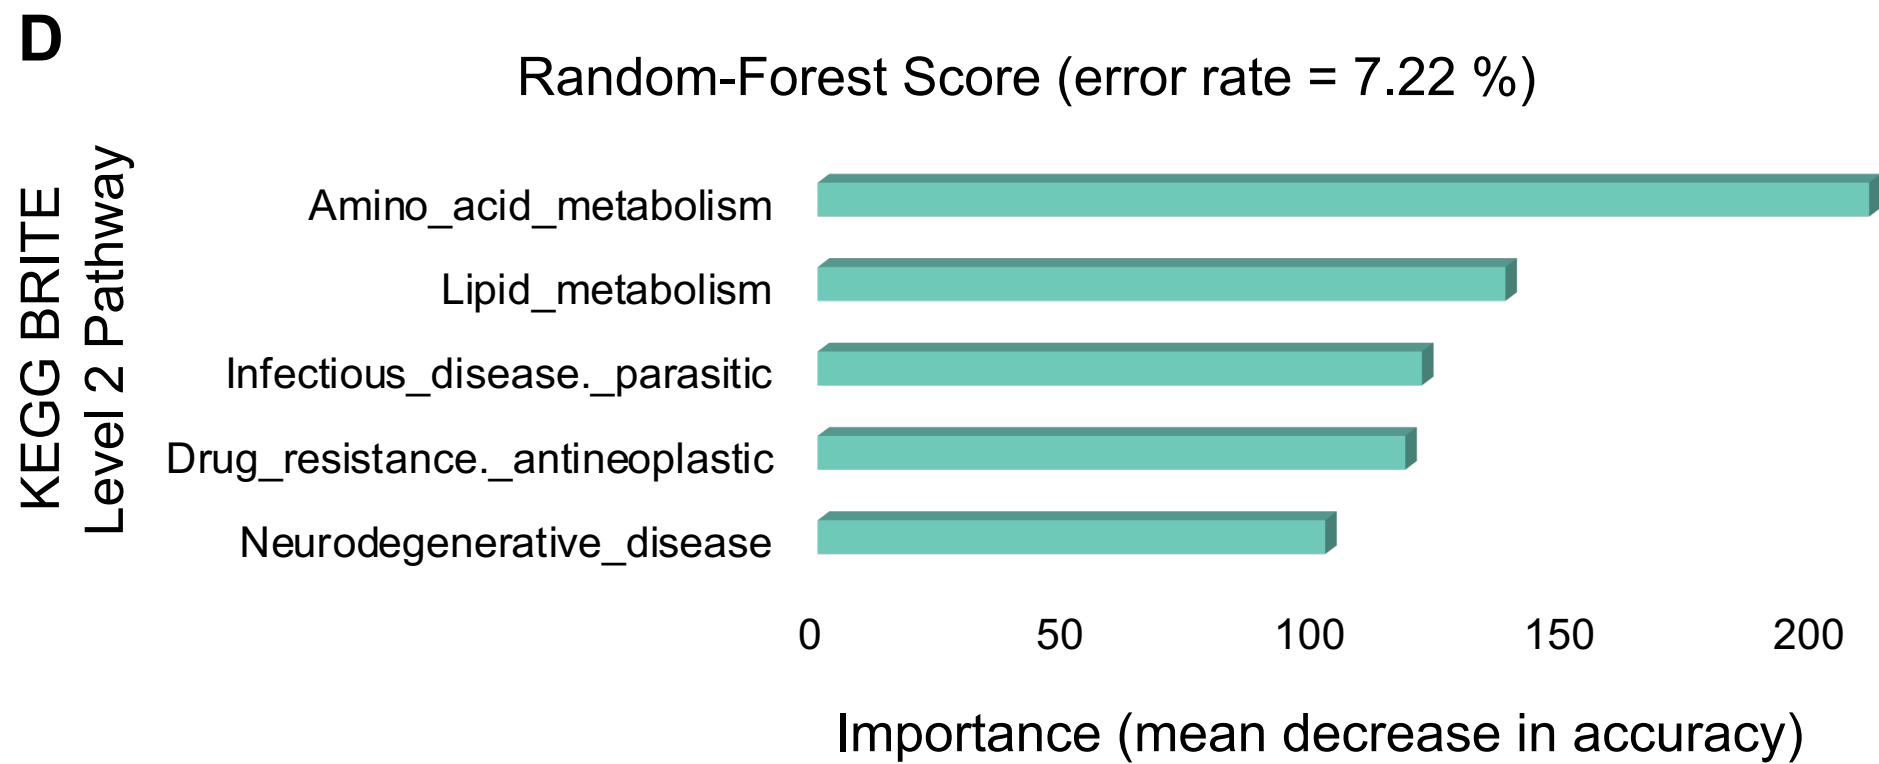

Supplement: IMT2-1-e1-s002.pdf [file IMT2-1-e1-s002.pdf]
